# Supplementary material
Source: PubMed Central journal article supplement (PMC10539034)
Supplement: NIHMS1931164-supplement-Supplement.pdf [file NIHMS1931164-supplement-Supplement.pdf]

## Supplemental Figure 1

- Endo
- ▨ Mid
- Epi

**A:  $E_{cc}$**

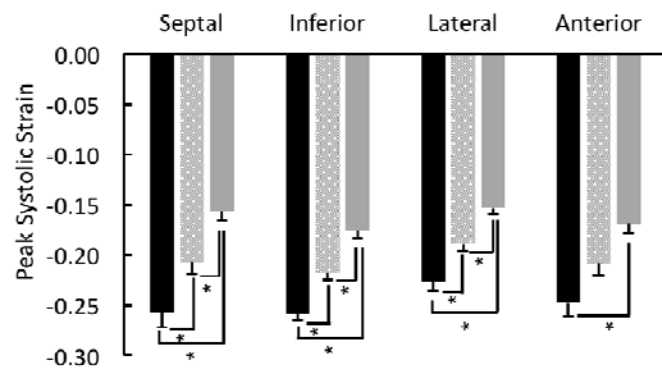

**B:  $E_{ll}$**

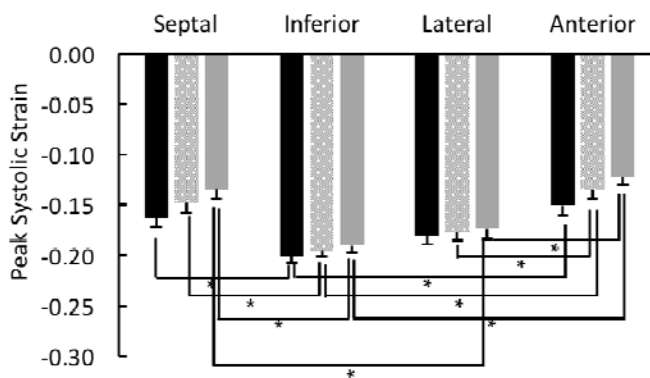

## Supplemental Figure 2

A:  $E_{cc}$

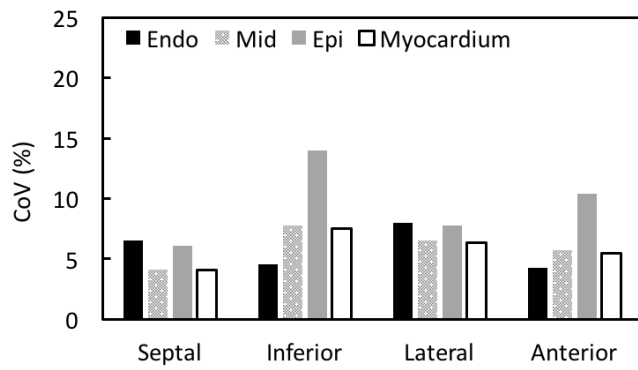

B:  $E_{ll}$

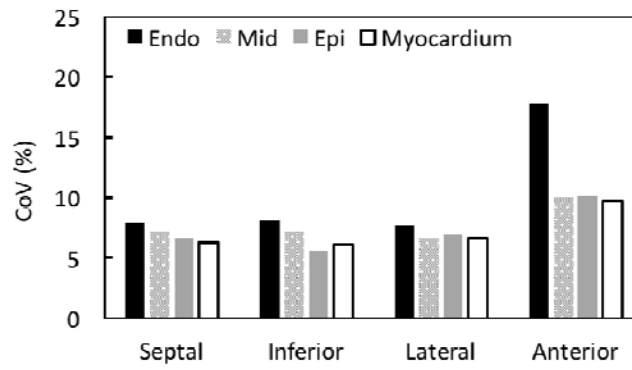

C:  $E_{cl}$

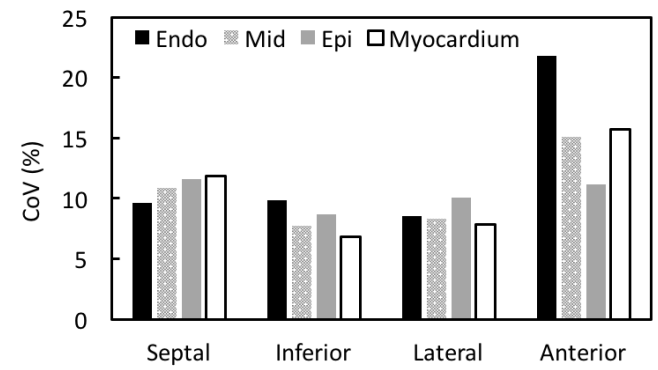

### Supplemental Figure 3

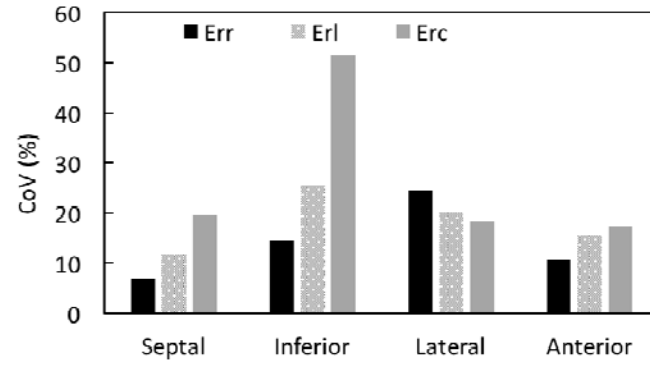

Supplemental Figure 4

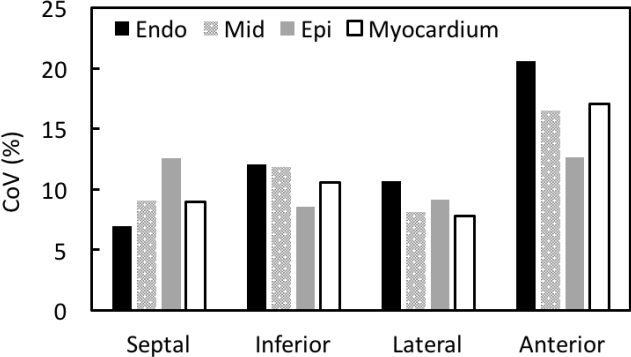

## Supplemental Table 1

|                       | <b>Base</b> | <b>Mid-LV</b> | <b>Apex</b> |
|-----------------------|-------------|---------------|-------------|
| <b>E<sub>cc</sub></b> | 2.88        | 4.65          | 6.99        |
| <b>E<sub>ll</sub></b> | 5.22        | 7.43          | 9.84        |
| <b>E<sub>rr</sub></b> | 10.12       | 11.84         | 11.16       |
| <b>E<sub>cl</sub></b> | 4.68        | 12.55         | 60.84       |
| <b>E<sub>rl</sub></b> | 6.31        | 18.38         | 13.32       |
| <b>E<sub>rc</sub></b> | 11.63       | 20.59         | 6.57        |

CoV < 20% was considered reproducible.

## Supplemental Table 2a

|          | Base             | Mid-LV           | Apex             |
|----------|------------------|------------------|------------------|
| $E_{cc}$ | $-0.20 \pm 0.01$ | $-0.21 \pm 0.01$ | $-0.20 \pm 0.01$ |
| $E_{ll}$ | $-0.13 \pm 0.01$ | $-0.14 \pm 0.01$ | $-0.12 \pm 0.02$ |
| $E_{rr}$ | $0.57 \pm 0.04$  | $0.59 \pm 0.04$  | $0.54 \pm 0.04$  |
| $E_{cl}$ | $0.03 \pm 0.00$  | $0.03 \pm 0.00$  | $0.02 \pm 0.00$  |
| $E_{rl}$ | $-0.10 \pm 0.02$ | $-0.12 \pm 0.01$ | $-0.10 \pm 0.01$ |
| $E_{rc}$ | $0.03 \pm 0.01$  | $0.06 \pm 0.01$  | $0.05 \pm 0.01$  |

Data are mean  $\pm$  SEM.

**Supplemental Table 2b**

|                       |      | <b>Mid-LV</b> |            |            |            |
|-----------------------|------|---------------|------------|------------|------------|
|                       |      | Septal        | Inferior   | Lateral    | Anterior   |
| <b>E<sub>cc</sub></b> | Endo | -0.26±0.01    | -0.26±0.01 | -0.23±0.01 | -0.25±0.01 |
|                       | Mid  | -0.21±0.01    | -0.22±0.01 | -0.19±0.01 | -0.21±0.01 |
|                       | Epi  | -0.16±0.01    | -0.18±0.01 | -0.15±0.01 | -0.17±0.01 |
| <b>E<sub>il</sub></b> | Endo | -0.16±0.01    | -0.20±0.01 | -0.18±0.01 | -0.15±0.01 |
|                       | Mid  | -0.15±0.01    | -0.20±0.01 | -0.18±0.01 | -0.13±0.01 |
|                       | Epi  | -0.13±0.01    | -0.19±0.01 | -0.17±0.01 | -0.12±0.01 |
| <b>E<sub>rr</sub></b> |      | 0.53±0.03     | 0.60±0.04  | 0.54±0.03  | 0.57±0.03  |
|                       | Endo | 0.04±0.01     | 0.07±0.00  | 0.05±0.01  | 0.02±0.01  |
| <b>E<sub>cl</sub></b> | Mid  | 0.05±0.00     | 0.06±0.00  | 0.05±0.00  | 0.03±0.01  |
|                       | Epi  | 0.05±0.00     | 0.05±0.00  | 0.05±0.00  | 0.04±0.00  |
| <b>E<sub>rl</sub></b> |      | -0.02±0.03    | -0.05±0.03 | -0.12±0.01 | -0.13±0.02 |
| <b>E<sub>rc</sub></b> |      | 0.04±0.01     | 0.02±0.02  | 0.08±0.02  | 0.04±0.01  |

Data are mean ± SEM.
